# Supplementary material
Source: PubMed Central journal article supplement (PMC170893)
Supplement: pnas_1633392100_3.pdf [file pnas_1633392100_3.pdf]

Transmembrane

Human : MEPTVADVHLVPTTKE--VPALDAACCRAASIGVVATSLVVLTGLVLLAFLSTQGFHVDHTAELRGIRWTSLSRRETSDYHRTLTPMLEALLHFLLRPLQTLISGLEEELLQRGIRARLRE : 120  
Mouse : MEPTAPDLQLVPEVTKAVSVSAPDPGPCRTAVIAVVGISMAIVTLGVLSAFFSAQGAHVEHIAELHGIRFTSSILQENSDFYRLLTHALQTLHFLLRALQPLSLKQEAIDLQKGIQARLQE : 122  
Rat : MEPAAPDLQPVPEVTKGVVPTPDSGCCRAAVTTVVAISVASLTLGVLSAFFSAQGVQVEHTAQLHGVRFTSSLQENSDFYRLLTALQTLHFLLRALQPLSLDQEAIDLQKGIQARLQ : 122

LDLR

Serase-1

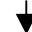

Human : HGISLAAYGTIVSAELTGRHKGPLAERDFKSGRCPCGNSFSCGNSQCVTKNVNEPCDDQEDCSDGSDEAHCECGLQPAWRMAGRIVGGMEASPGFEPWQASLRENKEHFCCGAAIINARWLVSAA : 242  
Mouse : QGLSLAAYGTIVSVELTGRCEGPVTERDLKSGHCPGNVFSQNGQCVSKENPECDDRVDCSDESDEAQCDCGWQPAWRMAGRIVGGVEAAPGEPWQVSLRENHEHFCCGATIIIGARWLVSAA : 244  
Rat : QGLSLAAYGTIITSVELTGRCEGPVTERDLKSGHCPGNVFSQNSQCVSKENPECDDRVDCSDGSDEAQCDCGWQPAWRMAGRIVGGVEAAPGEPWQVSLRENHEHFCCGATIIIGARWLVSAA : 244

Human : HCFNEFDPTKVVAVYGATYLSGSEASTVRAQVQIVKHPLYNADTADFVAVLELTSPLPFGRIHQVCLPAATHIFPPSKKCLISGWGYLKEDFLVKPEVLQKATVELLDQALCASLYGH : 364  
Mouse : HCFNEFDPAQWAAQAGSVHLSGSEASAVRTRVLRIAKHAPYADTADFVAVLELRLPFPGRYVQPAACLPATHVFPFGKCLISGWGYLKEDFLVKPEVLQKATVELLDQSLCSSLYGH : 366  
Rat : HCFNEFDPAQWAAQAGSVHLSGSEASAVRRARVLRIAKHAPYADTADFVAVLELRLPFPGRYVQPAACLPATHVFPFRKCLISGWGYLKEDFLVKPEVLQKATVELLDQNLCSLLYGH : 366

Human : SLTDRMVCAGYLDGKVDSCQDGGGLVCEEPSGRFFLAGIVSWGIGCAEARPGVYARVTRLRDWILEATTKASMPMAPAPAPSTAWPTSPESPVVSPTKSMQALSTVPLDWVTV : 486  
Mouse : SLTDRMVCAGYLDGKVDSCQDGGGLVCEEPSGRFFLAGIVSWGIGCAEARPGVYTRVTRLRDWILEVTSAADMPVPTATPAPATPSTPWPTSPESWAPNTFAKPTAAPSVPPLHPSTT : 488  
Rat : SLTDRMVCAGYLDGKVDSCQDGGGLVCEEPSGRFFLAGVSWGIGCAEARPGVYTRVTRLRDWILEVTSADTPVVPTEAPAPITPSTPWPTSPESRVPNTAKPTVAPTAPLHPSTA : 488

Serase-2

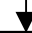

Human : PKLQECGARPAMEKPTRVVGFGAASGEVPWQVSLKEGRHFCGATVVGDRWLLSAAHCFNHTKVEQVRAHLGTASLLGLGGSPVKIGLRRVVLHPLYNPGILDVDFLAVLELASPLAFNKYI : 608  
Mouse : AKPQECGARPAMDKPTRIVGGISAVSGEVPWQASLKEGRHFCGATVVGDRWLLSAAHCFNHTKVEQVQAHLGTVSLLVGGSPVKLGLRRVALHPRYNPGILDVDFLAVLELAQPLVFNKYI : 610  
Rat : AKPQECGARPAMDKPTRIVGGISAVSGEVPWQASLKEGRHFCGATVVGDRWLLSAAHCFNHTKLEQVQAHLGTVSLLVGGSPVKLGLRSVALHPRYNPGILDVDFLAVLELAQPLVFNKYI : 610

Human : QPVCLPLAIQKFPVGRKCMISGWGNTQEGNATKPELLQKASVGIIDQKTCVSVLYNFSLTDRMICAGFLEGVKVDSCQDGGGLVCEEPAGVFYLAGIVSWGIGCAQVKKPGVYTRITRLKDW : 730  
Mouse : QPVCLPLAIHKFPVGRKCMISGWGNTQEGNATKPDILQKASVGIIEQKMGALYNFSLTDRMLCAGFLEGRVDSQDGGGLVCEEPAGVFYLAGIVSWGIGCAQAKKPGVYARITRLKDW : 732  
Rat : QPVCLPLAIHKFPVGRKCMISGWGNTQEGNATKPDILQKASVGIIEQKMGALYNFSLTDRMLCAGFLEGRVDSQDGGGLVCEEPAGVFYLAGIVSWGIGCAQAKKPGVYARITRLKDW : 732

Serase-3

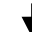

Human : ILEIMSSQPLPMSPP--STTRMLATTSERTT-AGLTVFGATPSRP-TPGAASRVTGQPANSTLSAVSTTARGQTPFPDAPEATHTQLPDCGLA-PAALTRIVGGSAAAGREWPQVSLWLR : 847  
Mouse : ILKAMSSDPSSMARPHSTSTRLLPSEPKTTAAGLIIP EATTSRLATPRATIRVTTREPLNTTLSARSTTRGQTAAPSAPGTTIHSHPDCGLAPPALTRIVGGSAAASLGEWPQVSLWLR : 854  
Rat : ILKAMSSDPSSTAHPHTSSTRLLPSPPTTTAAGL-IP EASTGRPATLRATIRVTTREPLNTTLSARSTTRRQTP---APGTTVFSHLPDCGLAPPALTRIVGGSAAASLGEWPQVSLWLR : 850

Human : RREHRCGAVLVAERWLLSAAHCFDVGDPKQWAAFLGTPFLLSSTEGQLERVARIYKHPFYNYITLDYDVALLELAGPVRRSRLVRPICLPEPAPRPPDGTRCVITGWGSLREGGSMARQLQK : 969  
Mouse : RREHRCGAVLVAERWLLSAAHCFDIYDPMQWAAFLGTPFLLSSTEGQLERVARIYRHPFYNYITLDYDVALLELAGPVRRSRLVRPICLPGPA-RPPDGARCVITGWGSLREGGSMARQLQK : 975  
Rat : RREHRCGAVLVAERWLLSAAHCFDVGDPKQWAAFLGTPFLLSSTEGQLERVARIYRHPFYNYITLDYDVALLELAGPVRRSRLVRPICLPGPT-RPPEGARCVITGWGSLREGGSMARQLQK : 971

Human : AAVRLLSEQTCRRFYPVQISSRMLCAGFPQGGVDSGSDAGGPLACREPSGRWVLTGVTSWGYGCGRPHFPVGYTRVAAVRGWIGQHIQE : 1059  
Mouse : AAVRVLSEQTCRRFYPVQISSRMLCAGFPQGGVDSGSDAGGPLACREPSGQWVLTGVTSWGYGCGRPHFPVGYTRVAAVLWIGQNIQE : 1065  
Rat : AAVRVLSEQTCRRFYPVQISSRMLCAGFPQGGVDSGSDAGGPLACREPSGQWVLTGVTSWGYGCGRPHFPVGYTRVAAVLWIGQNIQE : 1061
