# Supplementary material
Source: PubMed Central journal article supplement (PMC170893)

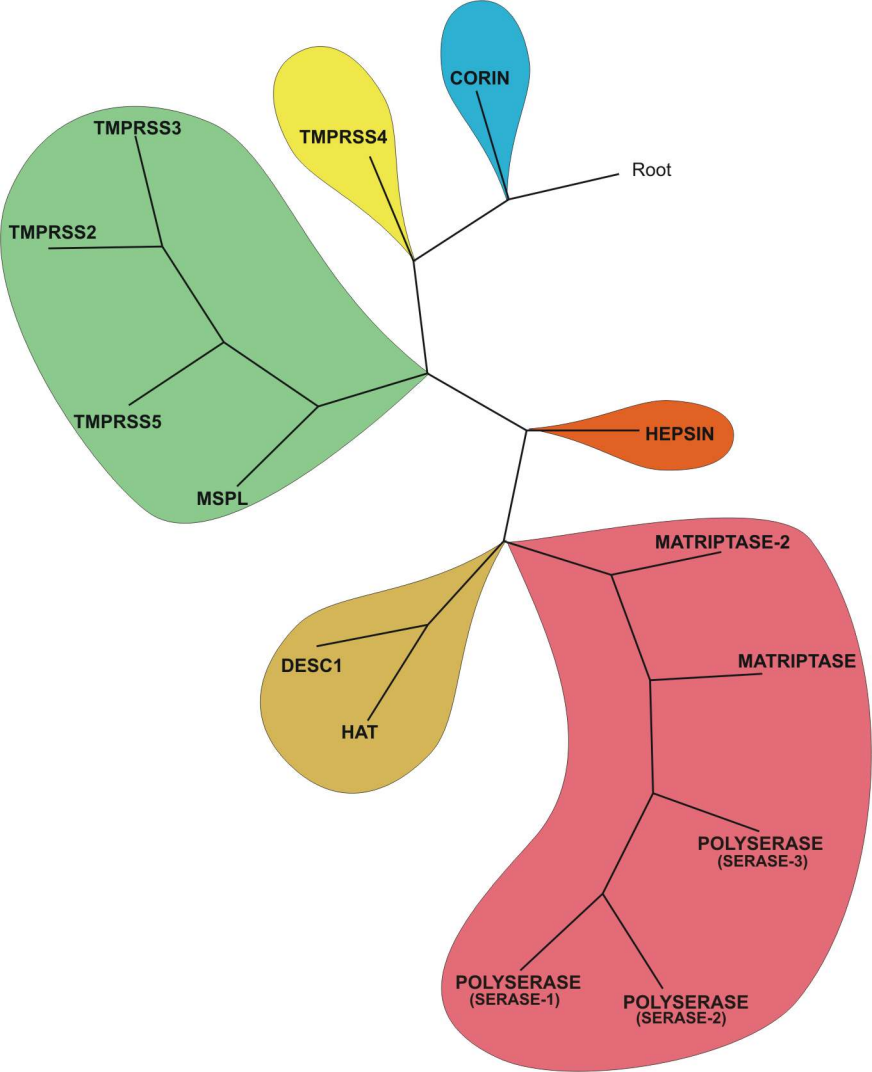

Supplement: pnas_1633392100_5.pdf [file pnas_1633392100_5.pdf]
